# Supplementary material for: Engineering the vasculature of decellularized rat kidney scaffolds using human induced pluripotent stem cell-derived endothelial cells
Source: Sci Rep. 2019 May 29;9:8001. doi: 10.1038/s41598-019-44393-y (PMC6541625; doi:10.1038/s41598-019-44393-y)
Supplement: Supplementary file 1 — Supplementary Information [file 41598_2019_44393_MOESM1_ESM.pdf]

**Engineering the vasculature of decellularized rat kidney scaffolds using human induced pluripotent stem cell-derived endothelial cells**

Osele Ciampi<sup>1</sup>, Barbara Bonandrini<sup>1,2</sup>, Manuela Derosas<sup>1</sup>, Sara Conti<sup>1</sup>, Paola Rizzo<sup>1</sup>, Valentina Benedetti<sup>1</sup>, Marina Figliuzzi<sup>1</sup>, Andrea Remuzzi<sup>3</sup>, Ariela Benigni<sup>1</sup>, Giuseppe Remuzzi<sup>1,4</sup>,  
Susanna Tomasoni<sup>1</sup>

<sup>1</sup>Istituto di Ricerche Farmacologiche Mario Negri IRCCS,  
Centro Anna Maria Astori, Science and Technology Park Kilometro Rosso, 24126 Bergamo, Italy

<sup>2</sup>Department of Chemistry, Materials and Chemical Engineering “Giulio Natta”,  
Politecnico di Milano, 20133 Milan, Italy

<sup>3</sup>Department of Industrial Engineering, Bergamo University, 24044 Dalmine (Bergamo), Italy

<sup>4</sup>L. Sacco' Department of Biomedical and Clinical Sciences, University of Milan, 20122 Milan,  
Italy

\* Correspondence should be addressed to:

Susanna Tomasoni, PhD  
Istituto di Ricerche Farmacologiche Mario Negri IRCCS  
Centro Anna Maria Astori  
Science and Technology Park Kilometro Rosso  
Via Stezzano, 87  
24126 Bergamo, Italy  
Tel: +39-035-42131; Fax: +39 035-319331  
email: [susanna.tomasoni@marionegri.it](mailto:susanna.tomasoni@marionegri.it)

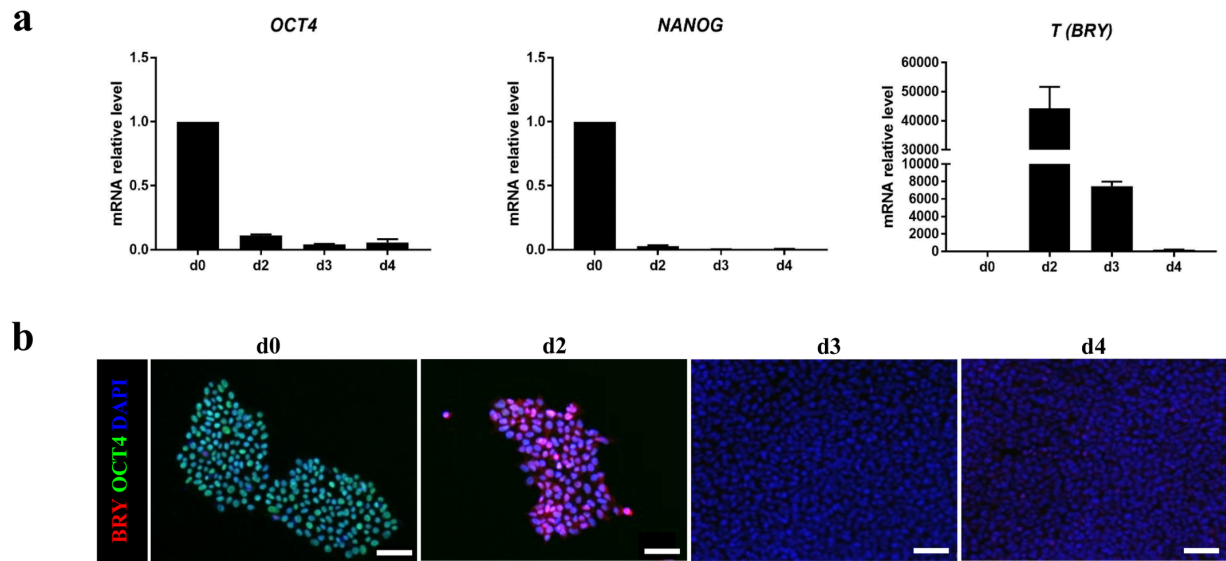

**Figure S1.** iPSC commitment into mesoderm. (a) Gene expression analysis shows decreased expression of pluripotency marker *OCT4* and *NANOG* and the induction of the mesoderm marker *T/(BRY)* expression. Data are expressed as mean  $\pm$  SD; (b) Representative images of OCT4 and BRY staining confirm the progressive loss of OCT4 expression and induction towards the mesodermal fate. Scale bar 50  $\mu$ m.

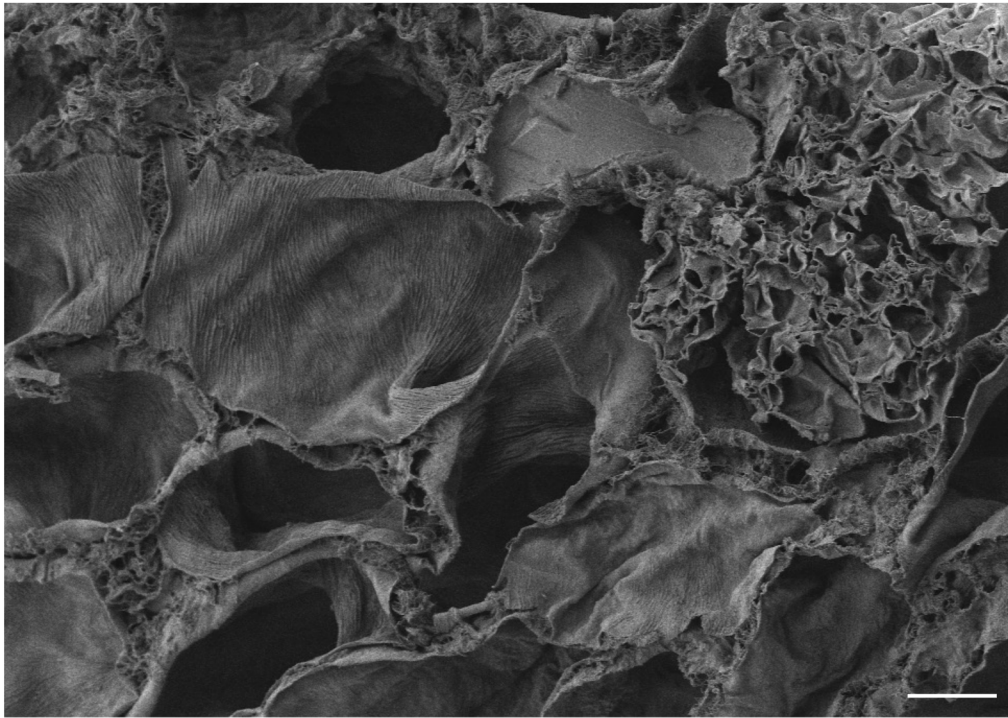

**Figure S2.** SEM image of decellularized scaffold. Image shows the absence of cells and well-preserved structures. Scale bar 10  $\mu\text{m}$ .

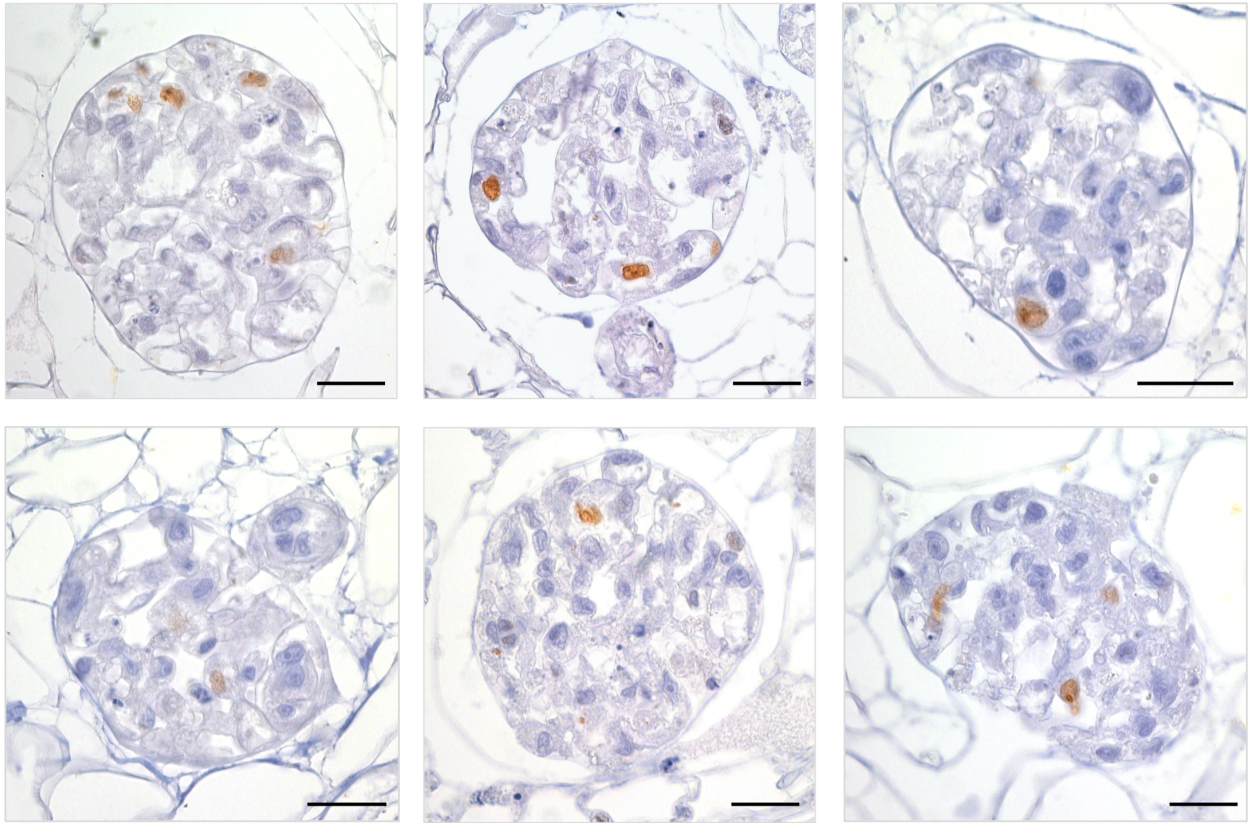

**Figure S3.** Ki67 immunostaining. Representative images of Ki67 staining show proliferative ability of iPSC-derived ECs after 48h infusion into rat kidney scaffold. Scale bar 20 μm.

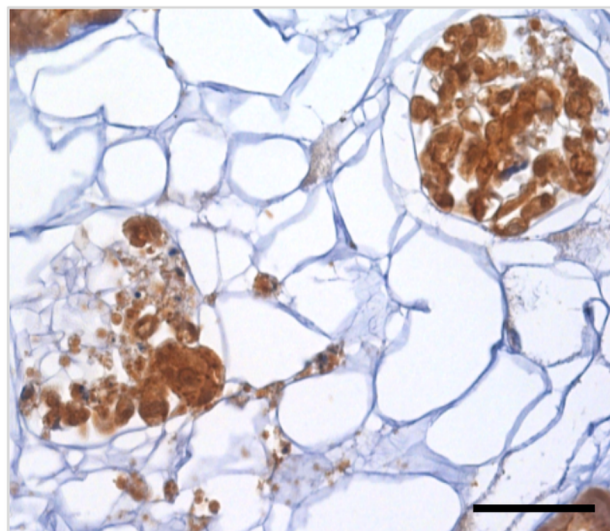

**Figure S4.** ZO-1 immunostaining. Representative image of ZO-1 staining shows that not all glomeruli were fully repopulated. Scale bar 50 μm.

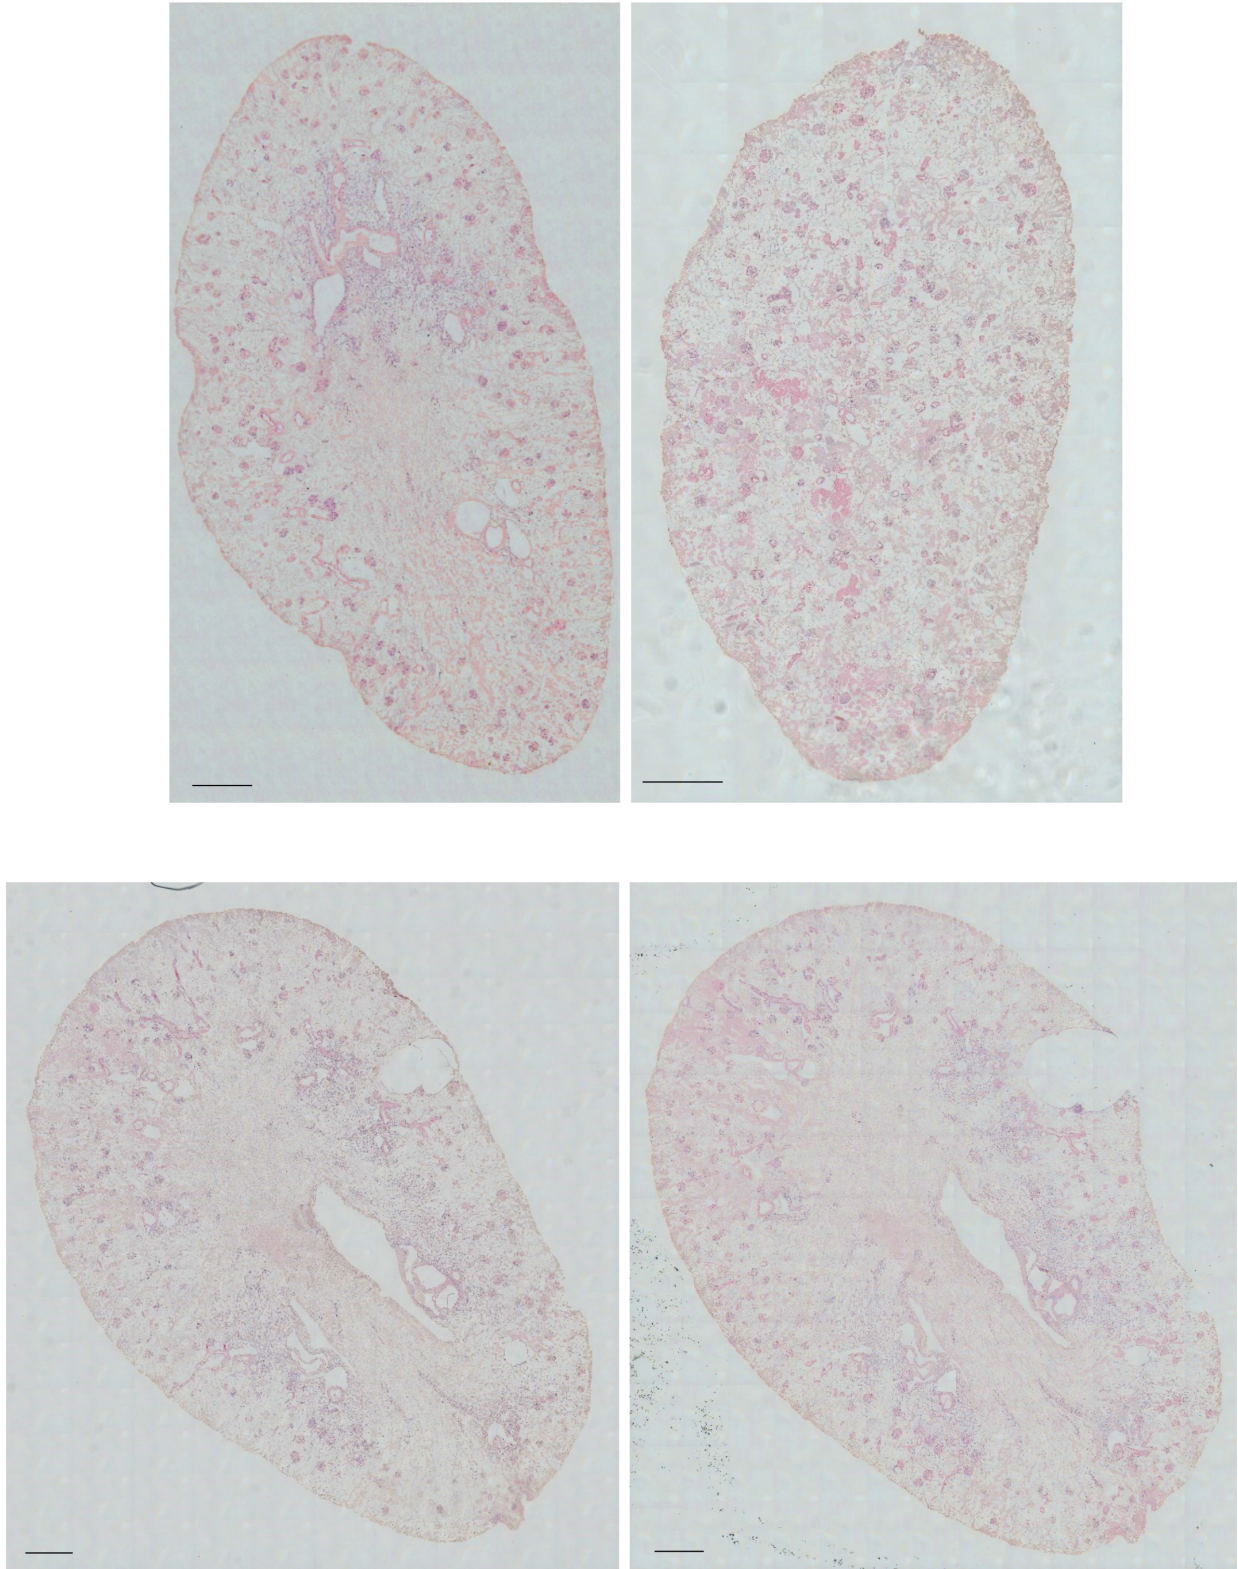

**Figure S5.** Reseeding of kidney scaffold with iPSC-derived ECs delivered by renal artery and vein. Mosaic view of transversal cross-sections of repopulated kidney demonstrating a homogeneous distribution of iPSC-derived ECs into glomeruli and vascular structures. Scale bar 500  $\mu\text{m}$ .

## Supplementary Methods

***Human iPSC differentiation into endothelial cells.*** hiPSCs were dissociated using Accutase and plated on growth factor-reduced matrigel-(BD Biosciences) coated dishes at a density of 47,000 cells/cm<sup>2</sup> in mTeSR1 medium with 10  $\mu$ M ROCK inhibitor Y-27632 (Sigma). After one day, medium was replaced with an induction medium consisting of a 1:1 mixture of DMEM:F12 (1:1) plus Glutamax (ThermoFisher Scientific) and Neurobasal media with N2 and B27 supplements (ThermoFisher Scientific), in the presence of 10  $\mu$ M CHIR99021 (Stemgent) and 25 ng/ml BMP4 (ThermoFisher Scientific). The induction medium was maintained for three days and thereafter replaced by StemPro-34 medium (ThermoFisher Scientific) supplemented with 200 ng/ml VEGF-A (ThermoFisher Scientific) and 2  $\mu$ M Forskolin (Sigma) for 2 more days in order to induce the endothelial phenotype. On day 6 of differentiation, cells were dissociated with Accutase and sorted by MACS separation to obtain pure endothelial cells. *MACS separation:* Cells on day 6 of the differentiation protocol were detached with Accutase, centrifuged and suspended into 80  $\mu$ l buffer (PBS Solution pH 7.2 containing 0.5% bovine serum albumin, BSA, and 2 mM EDTA) in the presence of 20  $\mu$ l CD144 antibody conjugated with micro beads (Miltenyi Biotec) for a total of 10<sup>7</sup> cells. After 20-minute incubation at 4°C, the cell suspension was washed by adding 2 ml of buffer and centrifuged at 300g for 10 minutes. Up to 10<sup>8</sup> cells were re-suspended in 500  $\mu$ l of buffer and then the cell suspension was loaded onto a MACS Column, which was placed in the magnetic field of a MACS Separator. After removing the column from the magnetic field, the magnetically retained CD144<sup>+</sup> cells were eluted with 5 ml of buffer and collected as positively selected cell fraction. CD144<sup>+</sup> cells were cultured on fibronectin (2  $\mu$ g/cm<sup>2</sup>, BD Biosciences) coating dishes in StemPro-34 medium supplemented with 50 ng/ml VEGF-A (maintenance medium).

**Organ decellularization.** The kidney was transferred, at room temperature, into the chamber containing the solution used for organ decellularization. The cannula previously inserted into the renal artery was connected to a peristaltic pump. The kidney was perfused with a solution of 1%

sodium dodecyl sulfate (SDS; Sigma) for 6 h at a flow rate of 0.4 ml/min. Hydraulic pressure was continuously recorded by a pressure transducer (WPI, Inc), a digital data acquisition system MP150, and AcqKnowledge software (BIOPAC Systems, Inc.). Perfusion pressure was maintained within a physiological range for the entire duration of the decellularization process. Finally, the kidney was perfused with distilled water to wash out the detergent.

**Table S1. List of primary antibodies**

| Antigen                      | Company                      | Cat. number | Dilution |
|------------------------------|------------------------------|-------------|----------|
| OCT4                         | Santa Cruz Biotechnology     | sc-5279     | 1:100    |
| Brachyury                    | Abcam                        | ab20680     | 1:100    |
| CD144                        | R&D System                   | AF938       | 1:100    |
| $\alpha$ -SMA Cy3 conjugated | Sigma                        | C6198       | 1:100    |
| vWF                          | Dako                         | A0082       | 1:400    |
| CD31                         | Abcam                        | ab28364     | 1:100    |
| Flk-1                        | Cell Signalling Technologies | #2479       | 1:100    |

**Table S2. List of Taqman Probes**

| Catalogue number | Gene Symbol         | Description                                                |
|------------------|---------------------|------------------------------------------------------------|
| Hs99999909_m1    | <i>HPRT1</i>        | Homo sapiens hypoxanthine phosphoribosyl transferase 1     |
| Hs00742896_s1    | <i>OCT4</i>         | Homo sapiens POU class 5 homeobox 1 (OCT4)                 |
| Hs02387400_g1    | <i>NANOG</i>        | Homo sapiens Nanog homeobox                                |
| Hs00610080_m1    | <i>T(BRY)</i>       | Homo sapiens T, brachyury homolog (mouse)                  |
| Hs00901465_m1    | <i>CDH5(CD144)</i>  | Homo sapiens cadherin 5, type 2 (vascular endothelium)     |
| Hs01065282_m1    | <i>PECAMI(CD31)</i> | Homo sapiens platelet/endothelial cell adhesion molecule 1 |
